# Supplementary material for: Survey of patient perceptions towards short-term mobile medical aid for those living in a medically underserved area of Swaziland
Source: PubMed Central journal article supplement (PMC4661953; doi:10.1186/s12913-015-1186-4), 2015-11-27
Supplement: 12913_2015_1186_MOESM1_ESM.pdf [file 12913_2015_1186_MOESM1_ESM.pdf]

**Version 1.0/20130813**

**Questionnaire**  
**(to be answered by patients)**

**In order to improve our quality of service, please kindly fill out the following questions.**

- 1) What's your major problem today? \_\_\_\_\_
- 2) Have you ever been treated for this problem before seeing this mission?  
 a. Yes                       b. No
- 3) What kind of health information was provided to you today? \*Multiple choices  
 a. none                       b. medical care                       c. personal hygiene  
 d. drug                       e. others, please specify  
\_\_\_\_\_
- 4) How well did you understand what the doctor(s) told you?  
 a. very much                       b. so so                       c. poorly
- 5) Do you understand how to care for your health problem(s) in the future?  
 a. Yes                       b. No                       c. not sure
- 6) How did you learn about this mission? \*Multiple choices  
 a. word of mouth                       b. sign/flier                       c. radio                       d. health provider
- 7) How long does it take you to get here from home?  
About \_\_\_\_\_ hour(s),  
by \_\_\_\_\_ \*Multiple choices  
 a. on foot                       b. public transportation (ex: bus)  
 c. personal vehicle (ex: car, motorcycle)                       d. others: \_\_\_\_\_ (ex: animal)
- 8) Please rate your overall experience with this mission.  
 a. excellent                       b. average                       c. poor
- 9) How often would you like to see the services being provided by this mission?  
 a. every 2 months                       b. every 4 months                       c. every 6 months  
 d. every year                       e. never again
- 10) Will there be medical providers to follow up your problem?  
 a. Yes                       b. No
- 11) How long does it take you to go to the **nearest** health provider (including clinic, health center, or hospital) from your home?  
About \_\_\_\_\_ hour(s),  
by \_\_\_\_\_ \*Multiple choices  
 a. on foot                       b. public transportation (ex: bus)  
 c. personal vehicle (ex: car, motorcycle)                       d. others: \_\_\_\_\_ (ex: animal)

---

**Version 1.0/20130813**

---

**Personal information**

---

- 12) Sex  
 a. female                       b. male
- 13) Age  
\_\_\_\_\_ years old
- 14) Current Marital status  
 a. single  
 b. married  
 c. divorced
- 15) How many years of education do you have?  
 a. never  
 b. primary school  
 c. secondary school  
 d. high school  
 e. college  
 f. master or above
- 16) Ethnicity  
 a. Swazis  
 b. others \_\_\_\_\_
- interviewer's signature : \_\_\_\_\_

***Thank you very much for your time and cooperation!!***
